# Supplementary figures and images for: PANK1 is a Prognostic Biomarker Associated with Immune Infiltration of Clear Cell Renal Carcinoma
Source: Research Square preprint supplement (doi:10.21203/rs.3.rs-957747/v1), 2021-10-13

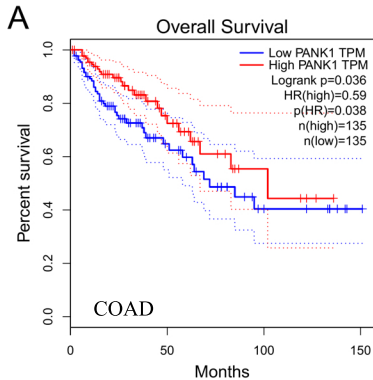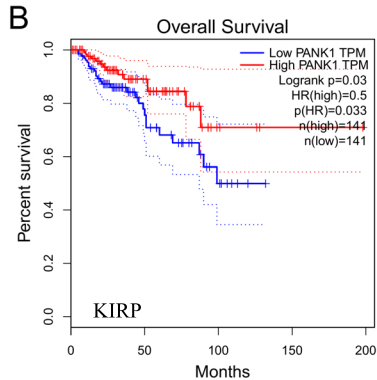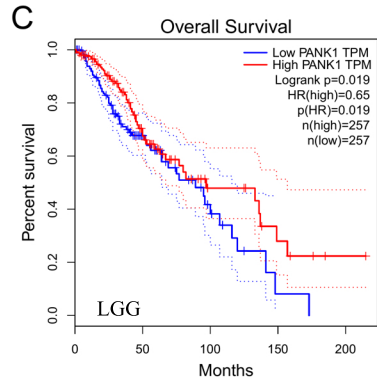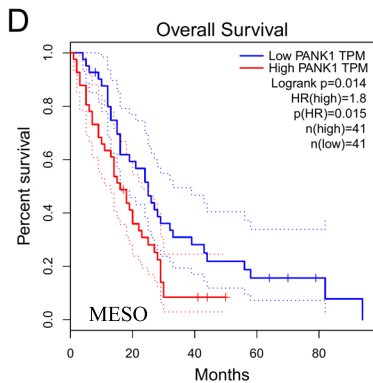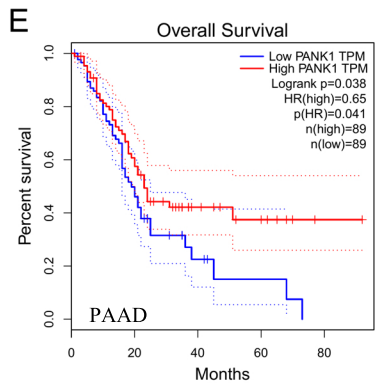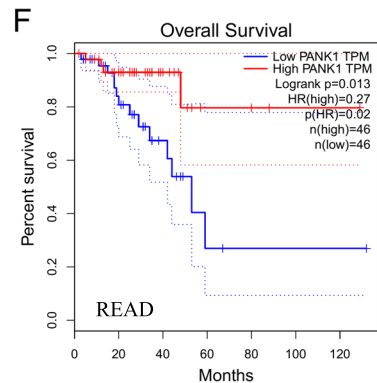

Supplement: Supplementary file 1 [file 6d54a2bbb2bd1bd381952f29.pdf]
